# Supplementary material for: The effects of surface acidity on CO2 adsorption over amine functionalized protonated titanate nanotubes
Source: Royal Society of Chemistry journal article supplement (doi:10.1039/c3ra42597e), 2013-01-01
Supplement: c3ra42597e.pdf [file c3ra42597e.pdf]

## **The effects of surface acidity on CO<sub>2</sub> adsorption over amine functionalized protonated titanate nanotubes**

Yue Liu,<sup>a</sup> Jie Liu,<sup>a</sup> Weiyuan Yao,<sup>a</sup> Wanglai Cen,<sup>a</sup> Haiqiang Wang,<sup>a</sup> Xiaole Weng<sup>a</sup> and Zhongbiao

Wu\*<sup>a,b</sup>

<sup>a</sup> *Department of Environmental Engineering, Zhejiang University, Yuhangtang Road 866, Hangzhou 310058, P.R. China. Fax: +86 0571 87953088; Tel: +86 571 88982863; E-mail: zbwu@zju.edu.cn*

<sup>b</sup> *Zhejiang Provincial Engineering Research Center of Industrial Boiler & Furnace Flue Gas Pollution Control, Hangzhou 310058, P.R. China. Fax: +86 571 87953088; Tel: +86 571 88982863; Emai: zbwu@zju.edu.cn*

\*Corresponding author: zbwu@zju.edu.cn

**Table S1** Textural properties of as-synthesized PTNTs and MCM-41<sup>a</sup>

| sample               | $S_{\text{BET}}^{\text{b}}$<br>( $\text{m}^2/\text{g}$ ) | $V_{\text{t}}^{\text{c}}$<br>( $\text{cm}^3/\text{g}$ ) | Inner pore diameter <sup>d</sup><br>(nm) | Average pore width <sup>e</sup><br>(nm) |
|----------------------|----------------------------------------------------------|---------------------------------------------------------|------------------------------------------|-----------------------------------------|
| As-synthesized PTNTs | 320.4                                                    | 1.07                                                    | 4~6                                      | 13.3                                    |
| MCM-41               | 661.2                                                    | 0.91                                                    |                                          | 3.9                                     |

<sup>a</sup> The characterization of nitrogen adsorption-desorption isotherms was obtained at 77 K under relative pressures ranging from 0.005 to 0.99 using Tristar II 3020 (V1.03) surface area and porosity measurement system (Micromeritics Inc. USA).

<sup>b</sup> Specific surface area were calculated using the Brunauer-Emmett-Teller (BET) method based on the linear part of the BET surface area plot ( $P/P_0=0.06-0.20$ );

<sup>c</sup>  $V_{\text{t}}$  was determined by the single point liquid nitrogen adsorption capacity at a relative pressure of  $P/P_0=0.974$ ;

<sup>d</sup> Inner pore diameter was determined by TEM images;

<sup>e</sup> Adsorption average pore width (4V/A by BET).

**Table S2** The adsorption characteristics of PEI functionalized PTNTs with different loading

| Samples   | amine capacity<br>(wt%) | CO <sub>2</sub> adsorption amount<br>(mmol/g) | Adsorption heat<br>(KJ/mol) |
|-----------|-------------------------|-----------------------------------------------|-----------------------------|
| PEI-PTNTs | 5                       | 0.15                                          | 38.45                       |
|           | 10                      | 0.34                                          | 40.35                       |
|           | 20                      | 0.96                                          | 48.54                       |
|           | 30                      | 1.69                                          | 61.50                       |
|           | 50                      | 2.97                                          | 66.99                       |

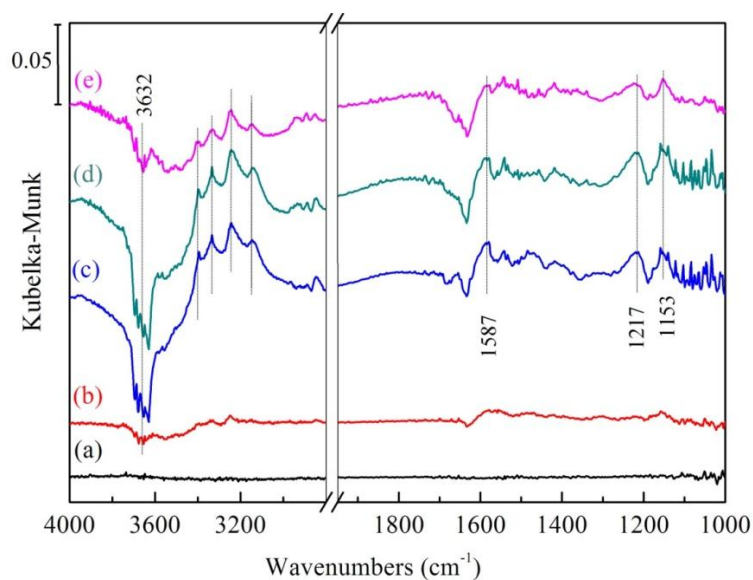

**Figure S1.** DRIFT spectra of NH<sub>3</sub> adsorption P25: (a): 0 min, (b) 1 min, (c) 5 min, (d) 30 min, (e) after purge for 60 min at 100 °C.

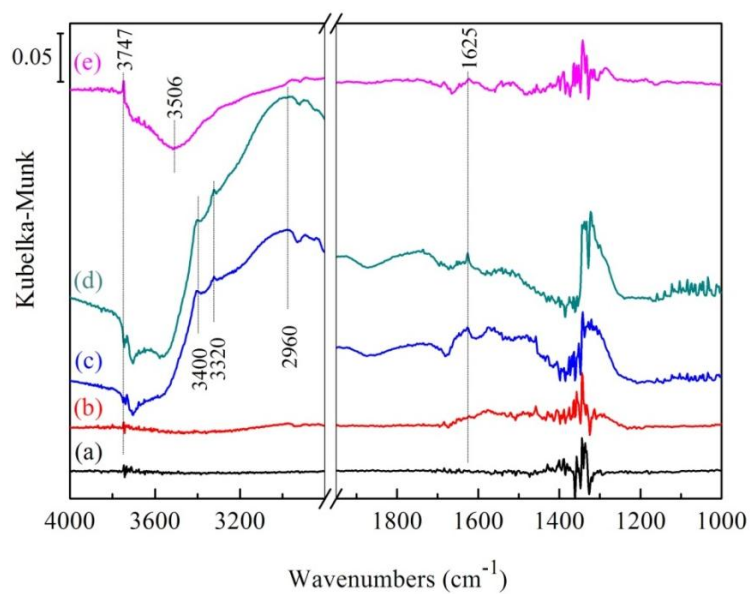

**Figure S2.** DRIFT spectra of NH<sub>3</sub> adsorption on MCM-41: (a): 0 min, (b) 1 min, (c) 5 min, (d) 30 min, (e) after purge for 60 min at 100 °C.

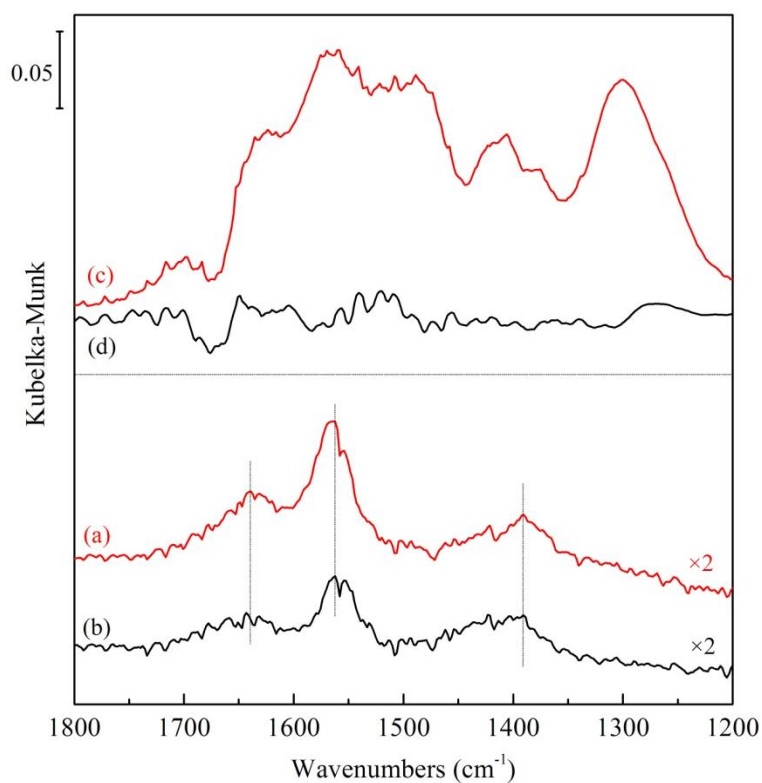

**Figure S3.** DRIFT spectra of the as-synthesized PTNTs (bottom) and PEI-PTNTs-30 (upper) when they exposed to CO<sub>2</sub> until adsorption equilibrium at 100 °C (red) and after purge in helium for 60 min (black): (a, b) PTNTs; (c, d) PEI-PTNTs-30.

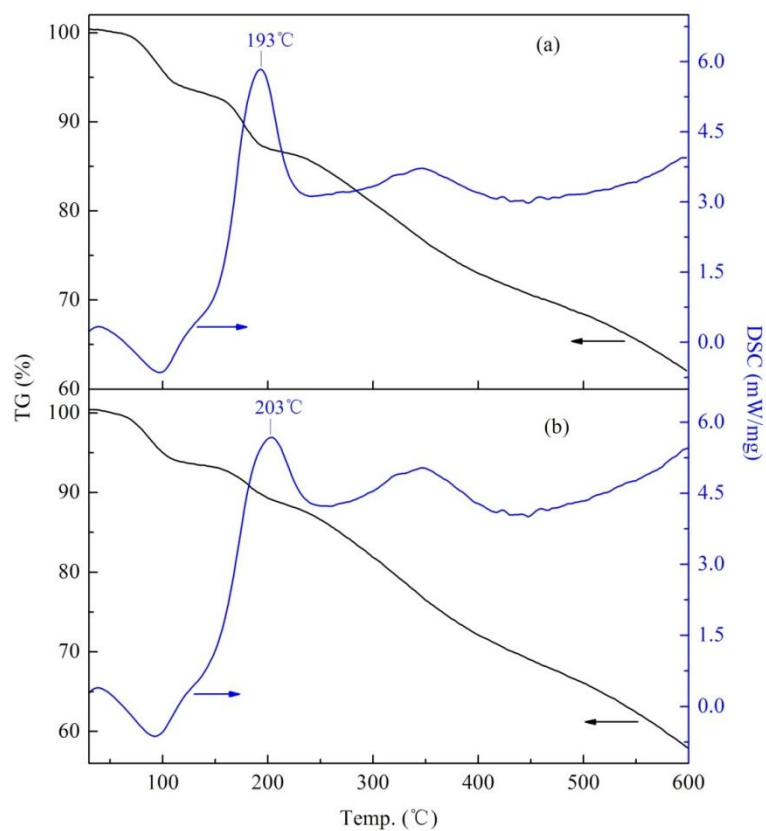

**Figure S4.** TG-DSC plots of (a) TEPA-MCM-41-43 and (b) PEI (1800)-MCM-41-43.
